# Supplementary material for: Disulfide disruption reverses mucus dysfunction in allergic airway disease
Source: PubMed Central journal article supplement (PMC7801631; doi:10.1038/s41467-020-20499-0), 2021-01-11
Supplement: 41467_2020_20499_MOESM1_ESM.pdf [file 41467_2020_20499_MOESM1_ESM.pdf]

## Supplementary information

### Disulfide disruption reverses mucus dysfunction in allergic airway disease

Leslie E. Morgan<sup>1,\*</sup>, Ana M. Jaramillo<sup>1,\*</sup>, Siddharth K. Shenoy<sup>2,3</sup>, Dorota Raclawska<sup>1</sup>, Nkechinyere A. Emezienna<sup>1,4</sup>, Vanessa L. Richardson<sup>1</sup>, Naoko Hara<sup>1</sup>, Anna Q. Harder<sup>1</sup>, James C. NeeDell<sup>1</sup>, Corinne E. Hennessy<sup>1</sup>, Hassan M. El-Batal<sup>5</sup>, Chelsea M. Magin<sup>1,5</sup>, Diane E. Grove Villalon<sup>6</sup>, Gregg Duncan<sup>2,7</sup>, Justin S. Hanes<sup>2,3,8,9</sup>, Jung Soo Suk<sup>2,3,9</sup>, David J. Thornton<sup>10</sup>, Fernando Holguin<sup>1</sup>, William J. Janssen<sup>1,11,12</sup>, William R. Thelin<sup>6</sup>, Christopher M. Evans<sup>1,12</sup>

<sup>1</sup> Department of Medicine, School of Medicine, University of Colorado, Aurora, CO, USA

<sup>2</sup> Center for Nanomedicine at the Wilmer Eye Institute, Johns Hopkins University School of Medicine, Baltimore, MD, USA

<sup>3</sup> Department of Ophthalmology, Johns Hopkins University School of Medicine, Baltimore, MD

<sup>4</sup> Department of Department of Obstetrics and Gynecology, Howard University College of Medicine, Washington, DC, USA

<sup>5</sup> Department of Bioengineering, College of Engineering, Design, and Computing, University of Colorado, Denver | Anschutz Medial Campus, Denver, CO, USA

<sup>6</sup> Parion Sciences, Inc., Durham, NC, USA

<sup>7</sup> Fischell Department of Bioengineering, School of Engineering University of Maryland, College Park, MD, USA

<sup>8</sup> Department of Pharmacology & Molecular Sciences, Johns Hopkins University School of Medicine, Baltimore, MD, USA

<sup>9</sup> Department of Chemical & Biomolecular Engineering, Johns Hopkins University, Baltimore, MD

<sup>10</sup> Wellcome Trust Centre for Cell-Matrix Research and the Lydia Becker Institute of Immunology and Inflammation, School of Biological Sciences, The University of Manchester, Manchester, UK

<sup>11</sup> Department of Medicine National Jewish Health, Denver, CO, USA

<sup>12</sup> Department of Immunology and Microbiology, School of Medicine, University of Colorado, Aurora, CO, USA

\* Both authors contributed equally to this work

#### Corresponding author:

Christopher M. Evans, PhD

Professor

Division of Pulmonary Sciences and Critical Care Medicine

Department of Medicine

University of Colorado Denver School of Medicine

12700 E 19th Avenue, Mailstop 8611, RC 2

Room P15-3121

Aurora, CO 80045

(303) 724-6573 [tele]

[Christopher.Evans@cuanschutz.edu](mailto:Christopher.Evans@cuanschutz.edu)

**Supplementary Table 1.** Lavage leukocyte totals in AEC analysis.

|                    | <b>Measure</b>              | <b>Vehicle, n = 6 mice</b> | <b>TCEP, 500 mM, n = 8 mice</b> | <b>p</b>           |
|--------------------|-----------------------------|----------------------------|---------------------------------|--------------------|
| <b>Total cells</b> | mean ( <i>sem</i> )         | 15.6 (3.8)                 | 5.8 (0.8)                       | 0.03 <sup>t</sup>  |
|                    | median ( <i>quartiles</i> ) | 13.7 (7.7-23.5)            | 4.8 (4.2-6.9)                   | 0.006 <sup>U</sup> |
| <b>Macrophages</b> | mean ( <i>sem</i> )         | 8.0 (1.8)                  | 4.2 (0.8)                       | 0.05 <sup>t</sup>  |
|                    | median ( <i>quartiles</i> ) | 7.5 (4.9-10.7)             | 3.5 (2.6-6.1)                   | 0.04 <sup>U</sup>  |
| <b>Eosinophils</b> | mean ( <i>sem</i> )         | 5.0 (0.2)                  | 1.0 (0.3)                       | 0.04 <sup>t</sup>  |
|                    | median ( <i>quartiles</i> ) | 3.1 (2.1-8.2)              | 0.6 (0.2-1.9)                   | 0.003 <sup>U</sup> |
| <b>Lymphocytes</b> | mean ( <i>sem</i> )         | 1.4 (0.5)                  | 0.5 (0.08)                      | 0.07 <sup>t</sup>  |
|                    | median ( <i>quartiles</i> ) | 0.8 (0.6-2.2)              | 0.5 (0.3-0.7)                   | 0.02 <sup>U</sup>  |
| <b>Neutrophils</b> | mean ( <i>sem</i> )         | 1.2 (0.8)                  | 0.2 (0.08)                      | 0.1 <sup>t</sup>   |
|                    | median ( <i>quartiles</i> ) | 0.4 (0.2-1.9)              | 0.1 (0.05-0.3)                  | 0.05 <sup>U</sup>  |

<sup>t</sup> Welch's t test, one-tailed

<sup>U</sup> Mann-Whitney U-test, one-tailed

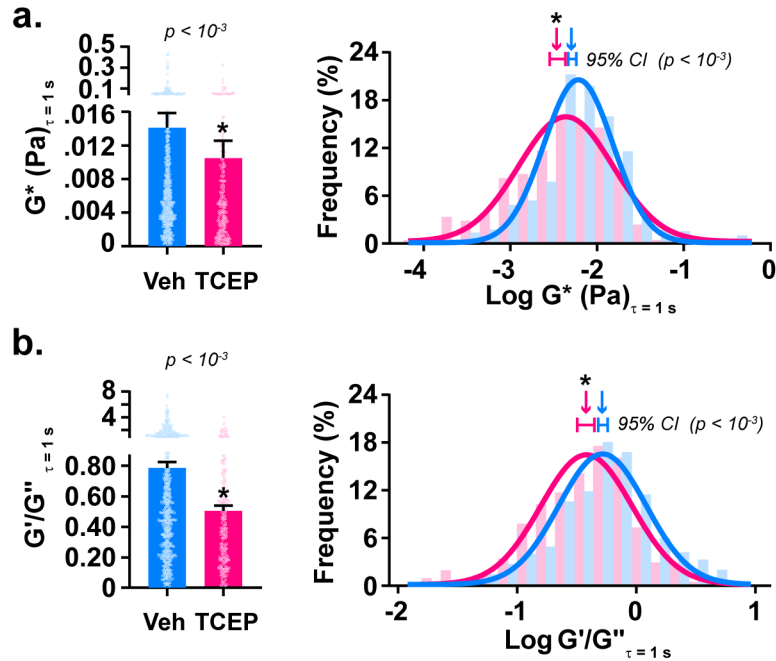

**Supplementary Fig. 1. TCEP reduces mucus viscoelasticity.** Multiple particle tracking was used to estimate mucus rheology. Carboxylated 2  $\mu\text{m}$  diameter polystyrene micro-particles were applied to mucus and incubated in the presence of TCEP (10 mM, magenta,  $n=205$  technical replicates) or saline vehicle (Veh, cyan,  $n=549$  technical replicates) for 30 min at  $37^\circ\text{C}$ . MSD values were mathematically converted to complex ( $G^*$ ), elastic ( $G'$ ), and viscous ( $G''$ ) moduli. Compared to Veh controls,  $G^*$  (**a**) and  $G'/G''$  ratio (**b**) decreased significantly after TCEP. Bars are means  $\pm$  sem, shown with individual points (open circles). Histograms show log distributions of particles with Gaussian fits, with horizontal bars indicating 95% confidence intervals and inverted arrows indicating median values. Significance was determined by two-tailed Mann-Whitney U tests with  $p$ -values shown and ‘\*’ denoting significance between TCEP and Veh treated samples. Source data are provided as a Source Data file.

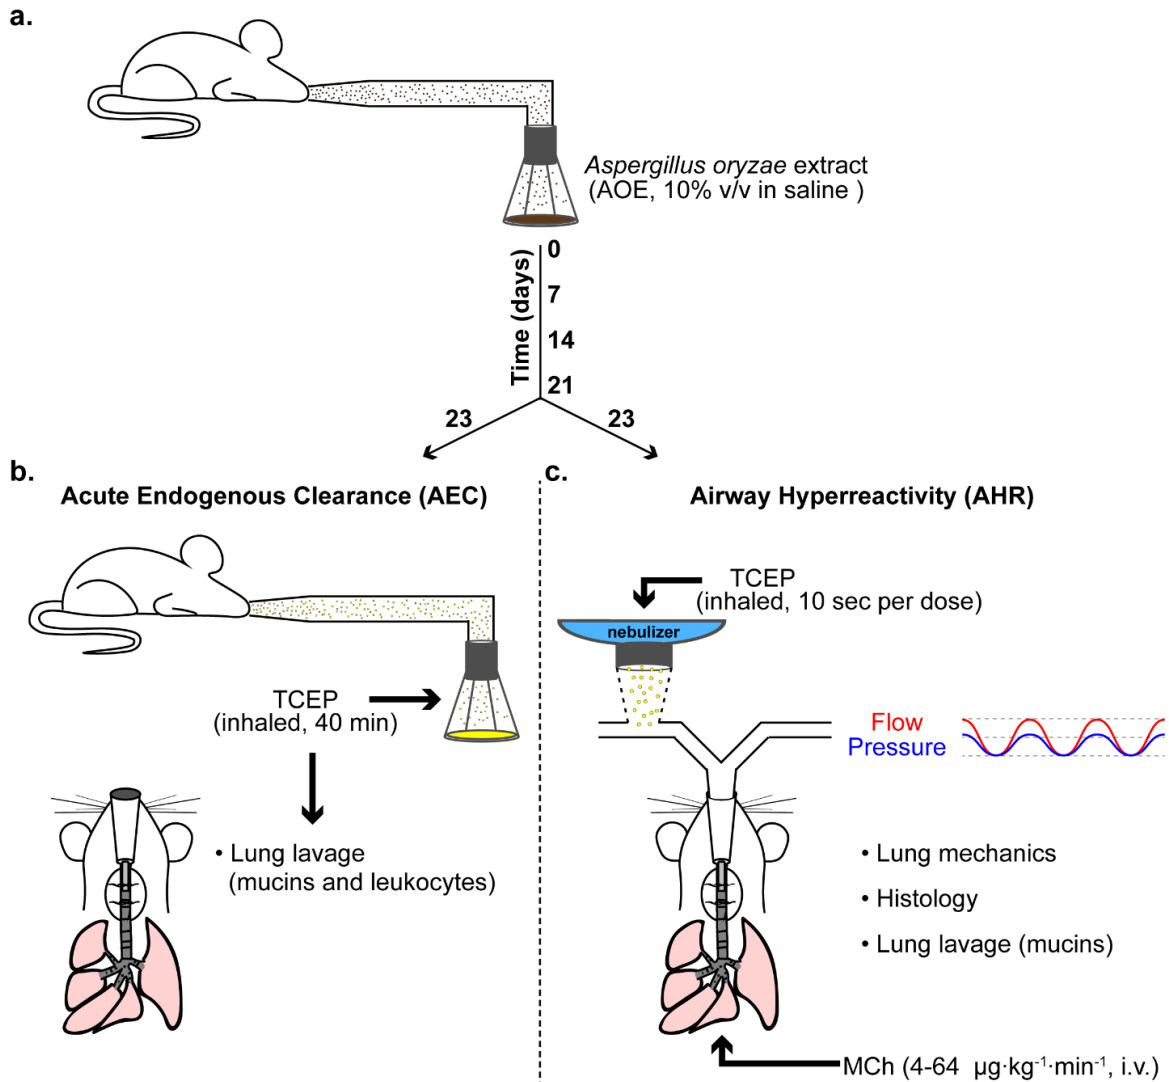

**Supplementary Fig. 2. Mouse models used for *in vivo* studies.** **a.** Wild type (WT) BALB/cJ mice were challenged by nose-only aerosol with *Aspergillus oryzae* extract (AOE) diluted 1:10 (vol/vol) in saline. A total volume of 5 ml was delivered over a 40 min period on days 0, 7, 14, and 21. Control mice received nose-only aerosols containing saline only. Mice were used for testing acute endogenous clearance (AEC) or airway hyperreactivity (AHR) two days after their last AOE challenge (day 23). **b.** For AEC, TCEP (500 mM) or saline vehicle was delivered in a 5 ml aerosol for 40 min. Mice were immediately used in lung lavage studies, and inflammatory cell numbers were enumerated. **c.** For AHR, lung mechanics and AHR to methacholine (MCh) were assessed in the presence of TCEP (100 mM) or saline vehicle, followed by determination of mucus plugging and mucin disruption.

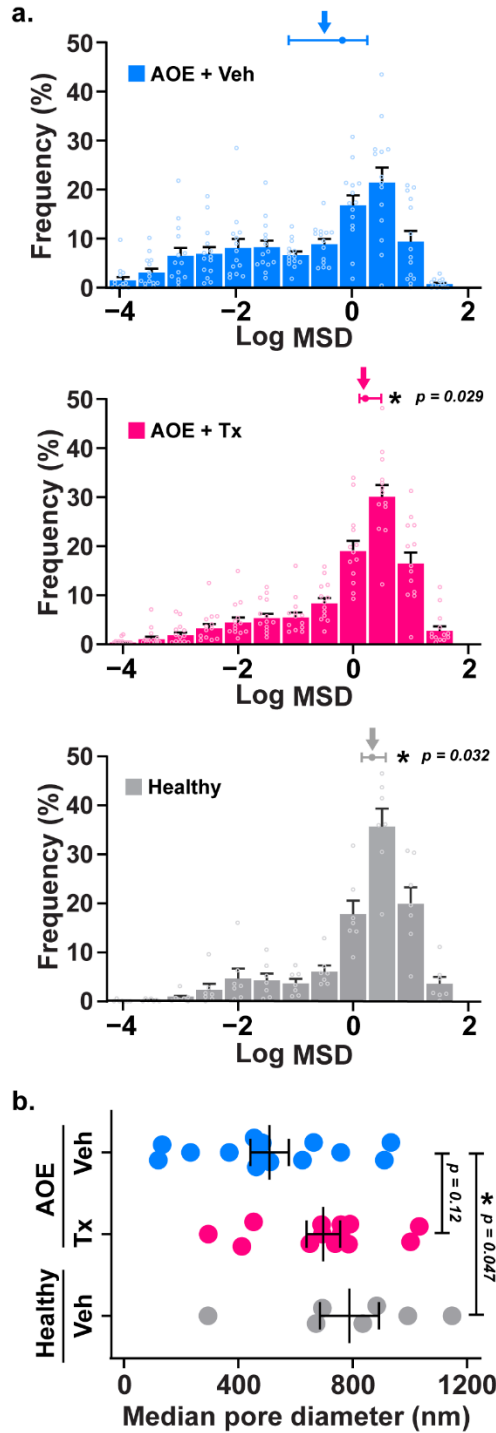

**Supplementary Fig. 3. Microstructural properties affected by TCEP in allergic mouse mucus *in vivo*.**  
**a.** Mean-squared displacement (MSD) measurements from diffusion of 100 nm muco-inert nanoparticles (MIPs) in tracheal mucus were used to calculate median pore sizes. Bars are medians  $\pm$  interquartile ranges. Inverted arrows indicate the average for each set. **b.** Compared to healthy mice (grey,  $n = 7$  mice), mucus shifted towards tighter pore sizes with AOE exposure (cyan,  $n = 14$  mice). TCEP treatment (Tx), increased mucus pore sizes in AOE challenged mice (magenta  $n = 13$  mice) to be comparable to the healthy state. Values are means  $\pm$  sem. P-values were determined by one-way ANOVA with Tukey's test for multiple comparisons. Source data are provided as a Source Data file.

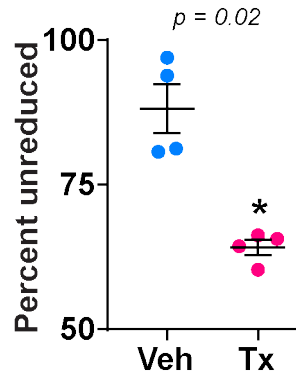

**Supplementary Fig. 4. Relative quantification of mucin polymers from mice in AEC studies.**

Intensities of high molecular weight (polymerized) and low molecular weight (depolymerized) mucins were evaluated using Image Studio software (Li-Cor). Demarcations of polymerized and depolymerized signals are indicated in **Fig. 2d**. Data are presented as the fraction of polymerized versus total (polymerized and depolymerized) signals per lane. TCEP treatment (Tx, magenta, n=4 mice) increased mucin depolymerization compared to Veh controls (cyan, n=4 mice). Data are means  $\pm$  sem. Significance was determined by one-tailed Mann-Whitney U test with p-value shown and ‘\*’ denoting significance ( $p < 0.05$ ) from Veh. Source data are provided as a Source Data file.

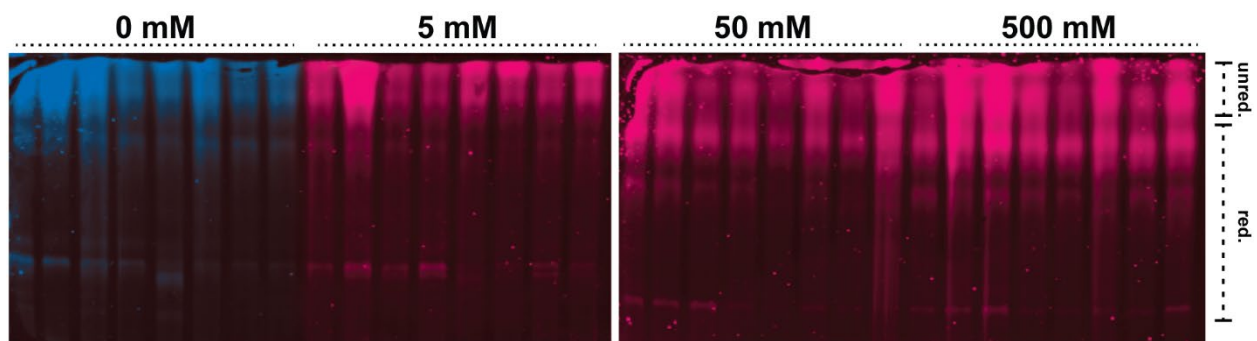

**Supplementary Fig. 5. Concentration dependent effects of TCEP on mucin depolymerization.**

Lung lavage fluid from AOE challenged mice was obtained after treatment by nose-only aerosol with TCEP (0 mM, cyan; 5 mM, 50 mM, and 500 mM, magenta, n = 8 mice per dosage group). Blot was probed with UEA-1 ( $\alpha$ 1,2-fucose). Image shows 8 samples per group. Data in blot image were used for quantification in **Fig. 2e**. Source data are provided as a Source Data file.

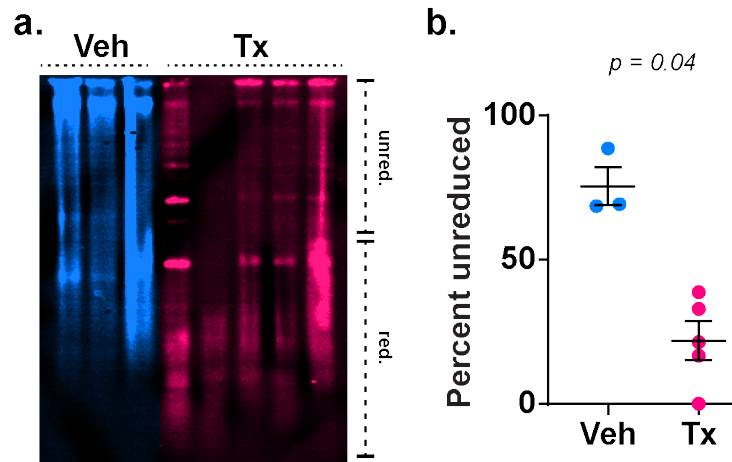

**Supplementary Fig. 6. Immunoblot analysis of mucolytic effects in lung lavage fluid from allergic mice after AHR analysis.** Lung lavage fluid from AOE challenged mice was obtained at the end of AHR studies. Equal volumes of lavage fluid (25  $\mu$ l) were loaded per well in 1% SDS agarose gels. Samples were separated by electrophoresis, vacuum transferred to PVDF membranes, blotted with rabbit-anti-Muc5b, and detected with anti-rabbit IgG conjugated with Alexa 680. **a.** Relative to saline vehicle controls (Veh, cyan, n=3 biological replicates), Muc5b migration was enhanced by TCEP treatment (Tx, magenta, n=5 biological replicates). **b.** Intensities of high molecular weight (polymerized) and low molecular weight (depolymerized) mucins were evaluated using Image Studio software (Li-Cor). Demarcations of polymerized and depolymerized signals are indicated in **a**. Data are presented as the fraction of polymerized versus total (polymerized and depolymerized) signals. Data in **b** are means  $\pm$  sem. Significance was determined by one-tailed Mann-Whitney U test with p-value shown and ‘\*’ denoting significance ( $p < 0.05$ ) from Veh. Source data are provided as a Source Data file.



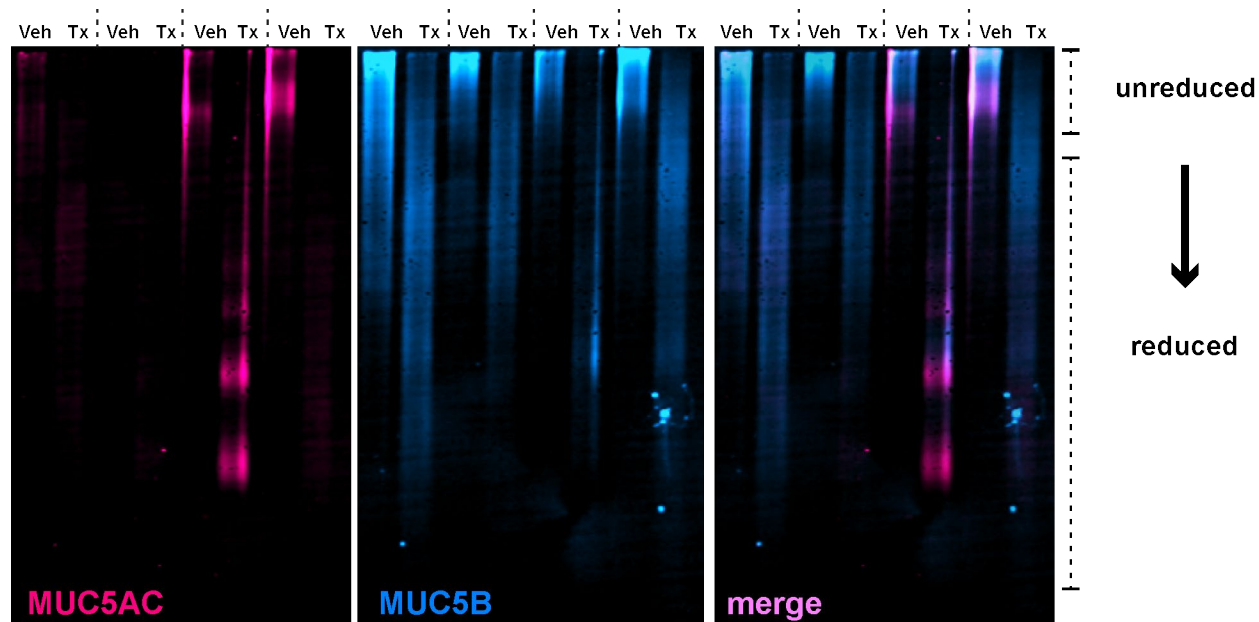

**Supplementary Fig. 7. TCEP depolymerizes MUC5AC and MUC5B in bronchoalveolar lavage fluid from human asthma patients.** Rabbit-anti-MUC5AC (magenta) and goat-anti-MUC5B (cyan) antibodies were applied (1:5,000 dilution) and developed using anti-rabbit-IgG conjugated with Alexa-680 and anti-goat-IgG conjugated with Alexa 800. Samples from n=4 patients with asthma were treated with TCEP (10 mM final concentration) at neutral pH for 10 min at 37°C. Note that full reduction causes epitope loss for both anti-mucin antibodies, resulting in diminished signal intensities. Source data are provided as a Source Data file.

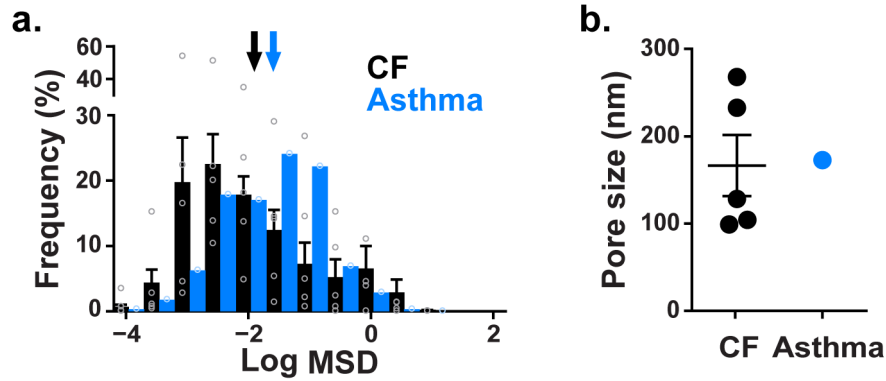

**Supplementary Fig. 8. Histogram and median pore sizes derived based on diffusion of 100 nm muco-inert nanoparticles in spontaneously expectorated sputum from cystic fibrosis patients and in mucus aspirated from bronchial explants from a fatal asthma patient.** Cystic fibrosis (CF) sputum (n = 5) and asthma (n = 1). **a.** Distribution of the log median MSD's of individual muco-inert nanoparticles (MIPs). Data represent at least 500 particles tracked per sample. Inverted arrows indicate the average for each set. The tracking resolution is Log (MSD) of -3 or MSD values of  $10^{-3} \mu\text{m}^2$ . Bars indicate means  $\pm$  sem of log median MSD's, with circles identifying individual median log MSD's for each replicate **b.** Median pore sizes in asthma mucus appear comparable to range in CF mucus. Data are means  $\pm$  sem with dots showing individual sample medians in **b.** Mucus solids concentrations were  $7.1 \pm 0.5\%$  (CF) and  $7.7\%$  (asthma). Source data are provided as a Source Data file.
